# Supplementary material for: Sequence alignment and 3D structure similarity searches are necessary to refine phylogeny trees for the identification of gene ancestors: the case of IGF system
Source: Research Square preprint supplement (doi:10.21203/rs.3.rs-8732881/v1), 2026-02-09
Supplement: Supplementary file 1 [file 62ca9cc9afc22728c53bbf26.xlsx]

## Sheet: Table S1
Table S1: For the 21 elements of the insulin-like growth factor system, details of the queries (symbol, name, UniProt Id, PDB/AFDB Id, description, AA interval/chain, average pLDDT for AF2 model) and of their targets for most evolutionary distant species identified by FSS (AFDB Id, average pLDDT, name, species; for the match characteristics: TM-score, sequence identity %, E-value, aligned amino-a…
QUERY characteristics									FSS RESULTS: TARGET and MATCH characteristics										Specific comments in case of results only close to significativity
Symbol	Name (Ensembl Id)	UniProt Id (AA sequence lenght)	PDB or AFDB (v4) Id (by default human species)	Description	Interval (in AA), and chain (for complex)	For AFDB Id: average pLDDT (whole sequence )	Comment in case of low average pLDDT (AF2 model)		Target Id (AFDB v4)	Average pLDDT over the whole lenght (AF2 model)	Name	Species	TM	Sequence identity (%)	E-value (significant when < 0.05; in bold)	Aligned amino acids in query	Aligned amino acids in target	Average pLDDT calculated for aligned AA in target
INS	insulin (ENSG00000254647)	P01308 (110)	PDB 2KQP (others available)	Nmr structure of proinsulin	25-110	/			AF-Q9VT52-F1	71.5	Probable insulin-like peptide 3	Drosophila melanogaster	0.45	23.1	3.38e-2	2-86	29-115	70.1	Numerous experimental 3D structures of the mature INS are available, including complexes (see https://www.uniprot.org/uniprotkb/P01308/entry). Mature INS consists in discrete A- and B- domains, from which a connecting (C-) domain is excised by proteases. FSS using as query PDB 2KQP, which corresponds to the non-cleaved proinsulin (including the A-,B- and C-domains), led to a significant match (E-…
			AF-P01308-F1	/	1-110	53.1	The AF2 model corresponds to the whole INS sequence, including the signal peptide and the propeptide, whereas the mature INS folds as two distinct segments (A- and B- domains) derived from the propeptide by cleavage of a C-domain. The two segments are linked by disulfide bridges (whereas in IGF-I/II, the same two peptides linked by disulfide bridges are separated by a specific loop, which is not …		not usable (average pLDDT on the A- and B domains < 70)
			→ BLASTP 1 in Table S2A									Ecdysozoaa
IGF-II	insulin like growth factor 2 (ENSG00000167244)	P01344 (180)	PDB 1IGL	Solution structure of human insulin-like growth factor ii relationship to receptor and binding protein interactions	25-91	/			AF-A0A0J7KQ37-F1	70.4	Insulin-like growth factor i protein	Lasius niger	0.59	36.3	1.9e-2	6-67	42-106	77.7	Non-significant E-values are explained by limited sequence similarity. Low TM score in D melanogaster is due to a variable loop separating the the two conserved segments (A- and B- peptides) linked by disulfide bridges (Fig. 2).
									AF-Q7JP91-F1	71.2	INSulin related	Caenorhabditis elegans	0.56	15.7	8.48e-1	5-61	67-114	84
									AF-Q9VT52-F1	71.5	Probable insulin-like peptide 3	Drosophila melanogaster	0.43	20.8	1.10e-1	1-66	26-120	65.4
			AF-P01344-F1	/	1-180	59.3	no additional domain with pLDTT≥ 70 outside PDB		not usable (average pLDDT on the A- and B domains < 70)
			→ BLASTP 2 in Table S2A									Ecdysozoaa
IGF-I	insulin like growth factor I (ENSG00000017427)	P05019 (195)	PDB 1B9G	Insulin-like-growth-factor-1 (mini IGF-I)	49-118	/			AF-P56173-F1	72.3	Putative insulin-like peptide beta-type 6	Caenorhabditis elegans	0.42	25.5	2.34e+0	6-52	54-100	86.3	Situation similar to that observed with IGF-II. Non-significant E-value is explained by limited sequence similarity while low TM score is due to a variable loop separating the the two conserved segments (A- and B- peptides) linked by disulfide bridges, but also to a rearrangement in the 3D structure core in mini IGF-I (pdb 1B9G) relative to the wild type IGF-I and insulin (De Wolf et al. 1996) (F…
			PDB 3LRI	Solution structure and backbone dynamics of long-[Arg(3)]insulin-like growth factor-I	49-118	/			AF-A0A0N4UGH3-F1	66.4	Uncharacterized protein	Dracunculus medinensis	0.41	26.4	3.24+0	7-79	1-73	61.5
				/	1-195	59.9	no additional domain with pLDTT≥ 70 outside PDB		not usable (pLDDT < 70)
			→ BLASTP 3 in Table S2A									Ecdysozoaa
INSR	insulin receptor (ENSG00000171105)	P06213 (1382)	PDB 7PG4	Low resolution cryo-EM structure of the full-length insulin receptor bound to 2 insulin, conf 3	1-1382	/			AF-Q9VJ04-F1	80	Receptor protein-tyrosine kinase	Drosophila melanogaster	0.625	24.5	3.18e-39	4-785	26-834	84.4
			→ BLASTP 4 in Table S2A									Drosophila melanogaster
IGF type 1 receptor	insulin-like growth factor 1 receptor (ENSG00000140443)	P08069 (1367)	PDB 1P4O	Structure of apo unactivated igf-1r kinase domain at 1.5Å resolution	974-1294	/			AF-P09208-F1	59.6	Insulin-like receptor	Drosophila melanogaster	0.84	62.1	1.23e-36	1-307	1350-1669	72.7	The low average pLDDT of the full length target AF-P09208 in Drosophila is due to low pLDDT values outside the seven domains whose 3D structures were experimentally determined (pdb 14PO), which were well superimposed between the query and target (Table S4)
			AF-P08069-F1	/	1-1367	78							0.55	33	0.00e+0	9-1367	304-1773	72.7
			→ BLASTP 5 in Table S2A									Drosophila melanogaster
IGF type 2 receptor (IGF-II/CIM6PR)	insulin like growth factor 2 receptor (ENSG00000197081)	P11717 (2491)	PDB for various domains									Drosophila melanogaster							See Table S3 for results obtained using as query different domains of the protein
			→ BLASTP 6 in Table S2A									Drosophila melanogaster
IGFBP-1	insulin-like growth factor binding protein 1 (ENSG00000146678)	P08833 (259)	PDB 2DSQ	Structural basis for the inhibition of insulin-like growth factors by igf binding proteins	chain G (166-259)	/			AF-Q8JHX6-F1	76.4	Insulin-like growth factor-binding protein 1	Danio rerio	0.67	38.2	5.72e-6	2-72	180-258	88	Using as query the experimental (PDB) 3D structure of IGFBP-1 limited to its C-terminal domain (AA 166-259), we identified a homolog in Danio rerio but not in Agnatha (Hagfish/Lamprey)
			AF-P08833-F1	/	1-259	79.3			AF-S4RH61-F1	68.4	Insulin-like growth factor-binding protein 1	Petromyzon marinus	0.32	29.7	1.61e-18	1-251	4-286	69.2	A significant relationship was highlighted with the sea lamprey homolog (E-value<0.05). TM are below the threshold value, due to the variable linkers between the two N- and C-terminal domains, which are well superimposed (not shown). This linker is also responsible for lowering the average pLDDT value calculated over the alignement length
			(→ BLASTP not shown)									no IGFBP-1 homolog in Agnatha (no significant results found)							BLASTP search restricted to Agnatha protein sequences, using as query the human protein sequence, was ineffective to identify an homolog in these species (not shown), probably due to low sequence similarity especially in the linker region (and/or to lacunar genome annotation in this species)
IGFBP-2	insulin-like growth factor binding protein 2 (ENSG00000115457)	P18065 (325)	PDB 2H7T	Solution structure of the C-terminal domain of insulin-like growth factor binding protein 2 (igfbp-2)	220-235	/			AF-B3F211-F1	71.1	Insulin-like growth factor-binding protein 2-B	Danio rerio	0.55	54.8	7.45e-7	2-105	162-265	77.5	The low pLDDT of the AF2 model of the target AF-A0A4W3J799-F1 is due to the varibale linkers between the two N- and C-terminal domains. The most distant species found with FSS is Callorhichus and Petromyzon with BLASTP. Petromyzon marinus IGFBP-2 (XP_032801029.1) is included in the UniProt database (A0AAJ7SKZ8), but the AF2 model was not available. Its domain characteristics are, AA 31-114: IGFBP…
			AF-P18065-F1	/	1-325	66.6	Confident prediction for the N- (AA 48-118, pLDDT=91.6) and C-(AA 207-220/230-298, pLDDT=76.75) domains, separated by a linker with low pLDDT		AF-A0A4W3J799-F1	67.4	Thyroglobulin type-1 domain-containing protein	Callorhinchus milii	0.52	53.8	2.55e-12	135-287	1-150	67.4
			→ BLASTP 7 in Table S2A									Petromyzon marinus
IGFBP-3	insulin like growth factor binding protein 3 (ENSG00000146674)	P17936 (291)	PDB 7WRQ	Structure of human igf1/igfbp3/als ternary complex	chain B (28-291)	/			AF-Q66I28-F1	70.4	Insulin-like growth factor-binding protein 3	Danio rerio	NA	43	7.98e-16	2-167	23-290	70	Significant E-value due to high similarity with the two conserved N- and C- domains, TM are below the threshold value (or not available - NA), due to the variable linkers between the two N- and C-terminal domains, which are well superimposed (this linker is also responsible for lowering the average pLDDT values).
			AF-P17936-F1	/	1-291	67.9	Confident prediction for the N- (AA 44-126, pLDDT=90.756) and C- (AA 208-278, pLDDT=81.2) domains, separated by a linker with low pLDDT		AF-S4RHZ7-F1	63.1	Insulin-like growth factor-binding protein 3	Petromyzon marinus	0.34	44.9	1.62e-23	1-274	6-276	61
			→ BLASTP 8 in Table S2A									Petromyzon marinus							Domain characteristics of Petromyzon IGFBP-3 (AF-S4RHZ7-F1) are, AA 52-133: IGFBP N-terminal domain; AA 230-304: thyroglobulin type-1 domain (https://www.uniprot.org/uniprotkb/A0A1Q1NIC3/entry)
IGFBP-4	insulin like growth factor binding protein 4 (ENSG00000141753)	P22692 (258)	PDB 1WQJ	Structural basis for the regulation of insulin-like growth factors (igfs) by igf binding proteins (igfbps)	24-103	/			AF-A0A444UBU7-F1	72.75	Insulin-like growth factor-binding protein 4	Acipenser ruthenus	0.96	78.4	1.42e-12	1- 79	24-102	95.3
									AF-A0A4W3HIT4-F1	50.3	Insulin-like growth factor-binding protein 4	Elephant shark (Callorhinchus milii)	0.96	72.1	4.08e-11	1- 79	351-429	90.9
			AF-P22692-F1	/	1-258	77.4			AF-A0A444UBU7-F1	72.75	Insulin-like growth factor-binding protein 4	Acipenser ruthenus	0.47	57	4.47e-24	1-212	6-209	75	Significant E-value due to high similarity with the two conserved N- and C- domains, TM are below the threshold value, due to the variable linkers between the two N- and C-terminal domains, which are well superimposed (this linker is also responsible for lowering the average pLDDT values).Note that this homolog as also found starting with the experimental 3D structure, limited to the N-terminal d…
			→ BLASTP 9 in Table S2A									Elephant shark (Callorhinchus milii)							Callorhinchus milii IGFBP-4 identified by BLASTP is XP_007899760.1 that is linked to UniProt V9L7N1 (https://www.uniprot.org/uniprotkb/V9L7N1/entry), whereas FSS led to identify AF-A0A4W3HIT4-F1 (https://www.uniprot.org/uniprotkb/A0A4W3HIT4/entry). Both proteins are encoded by the gene LOC103183854. This may be due to discrepancies between NCBI and Uniprot databanks, related to approximative anno…
IGFBP-5	insulin like growth factor binding protein 5 (ENSG00000115461)	P24593 (272)	PDB 1H59	Complex of IGFBP-5 with IGF-I	chain B (60-112)	/			AF-F6QEK5-F1	75	Uncharacterized protein	Ciona intestinalis	0.85	38.6	1.31e-3	2-45	64-106	88.1
									AF-A0A6P4Y511-F1	73.3	insulin-like growth factor-binding protein 5	Branchiostoma belcheri	0.91	56.8	1.87e-4	2-45	64-106	97
			AF-P24593-F1	/	1-272	76			AF-F6QEK5-F1	75	Uncharacterized protein	Ciona intestinalis	0.37	30.1	2.75e-16	3-263	29-250	77	Significant E-value due to high similarity with the two conserved N- and C- domains, TM are below the threshold value, due to the variable linkers between the two N- and C-terminal domains, which are well superimposed (this linker is also responsible for lowering the average pLDDT values). Note that this homolog was also found starting with the experimental 3D structure, limited to the N-terminal…
			→ BLASTP 10 in Table S2A									Branchiostoma belcheri							Domain characteristics of Branchiostoma belcheri IGFBP-5 are, AA 24-104: IGFBP N-terminal domain;AA 227-294: Throglobulin type-1 domain (https://www.uniprot.org/uniprotkb/A0A6P4Y511/entry)
IGBBP-6	insulin like growth factor binding protein 6 (ENSG00000167779)	P24592 (240)	PDB 1RMJ	C-terminal domain of insulin-like growth factor (IGF) binding protein-6: structure and interaction with IGF-II	161-240	/			AF-F6N9E8-F1	73.25	Insulin-like growth factor-binding protein 6b	Danio rerio	0.62	52.1	2.22e-5	23-91	131-199	83.8
									AF-A0A2R8QKX9-F1	76.4	Insulin-like growth factor-binding protein 6a	Danio rerio	0.57	47.2	1.02e-4	26-95	117-188	84.5
									AF-F6QHE7-F1	82.5	Uncharacterized protein	Ciona intestinalis	0.52	26.7	1.09e+0	23-90	21-88	84.6	TM < 0.5 but: False positive (similarity limited to the C-domain (thyroglobulin type 1), with no signifiant E-value) (Fig. 3)
			AF-P24592-F1	/	1-240	69.7	Confident prediction for the N- (AA 70-107, pLDDT=94.9) and C- (163-215, pLDDT=85.0) domains, separated by a linker with low pLDDT		AF-F6QEK5-F1	75	Uncharacterized protein	Ciona intestinalis	0.42	24.6	2.98e-11	63-236	63-225	74.5	Significant E-value due to high similarity with the two conserved N- and C- domains, TM are below the threshold value, due to the variable linkers between the two N- and C-terminal domains, which are well superimposed (this linker is also responsible for lowering the average pLDDT values) (Fig. 3)
			→ BLASTP 11 in Table S2A									Bony fishes. No IGFBP-6 in Callorihinus milii, Petromyzon, Ciona intestinalis (not shown)
ALS	insulin like growth factor binding protein acid labile subunit (ENSG00000099769)	P35858 (605)	PDB 7WRQ	Structure of human igf1/igfbp3/als ternary complex	chain A (28-605)	/			AF-Q18902-F1	84.5	ELRR (Extracellular Leucine-Rich Repeat) Only	Caenorhabditis elegans	0.82	21.7	1.91e-11	6-500	51-667	94.6
									AF-Q0KHN6-F1	71.8	Uncharacterized protein, isoform C	Drosphila melanogaster	0.73	26.5	3.34e-13	32-500	394-904	92.4
									AF-A0A6B1FC20-F1	85.6	Uncharacterized protein	Gemmatimonadetes bacterium	0.60	26.7	4.97e-8	140-531	251-644	95.4
			→ BLASTP 12 in Table S2A									Ecdysozoa; Acidobacteriota bacterium
IMPL2 (drosphila)	Drosophila Ecdysone-inducible gene L2 FBgn0001257	Q09024 (267)	PDB 6FEY	Crystal structure of drosophila neural ectodermal development factor imp-l2 with drosophila dilp5 insulin	26-267	/			AF-G5ECB1-F1	91.5	Zwei Ig domain protein zig-4	Caenorhabditis elegans	0.76	24.5	6.45e-16	2-196	45-249	95
PAPP-A	pappalysin 1 (ENSG00000182752)	Q13219 (1627)	PDB 7UFG	Cryo-em structure of papp-a in complex with igfbp5	81-1627	/			AF-A0A0G2KQH4-F1	78.4	Pregnancy-associated plasma protein A, pappalysin 1a	Danio rerio	0.78	55.9	0.00e+0	1-1151	87-1340	81.9	Fig 5
									AF-F1Q5Q4-F1	79.4	Pregnancy-associated plasma protein A, pappalysin 1b	Danio rerio	0.78	56.3	0.00e+0	2-1151	85-1336	83.4
									AF-A0A077YXQ0-F1	70.3	Laminin G 3 and Notch and Sushi and Peptidase M43 domain containing protein	Trichuris trichiura	0.59	29.6	1.38e-99	2-1151	79-1359	75.3
			→ BLASTP 13 in Table S2A									Trichinella pseudospiralis
PAPP-A2	pappalysin 2 (ENSG00000116183)	Q9BXP8 (1791)	PDB 8SL1	Cryo-em structure of papp-a2	235-1791	/			AF-E9QCK7-F1	74.6	Pregnancy-associated plasma protein A, pappalysin 2	Danio rerio	0.90	50.8	0.00e+0	2-842	228-1122	84.1
									AF-A0A077YXQ0-F1	70.3	Laminin G 3 and Notch and Sushi and Peptidase M43 domain containing protein	Trichuris trichiura	0.76	32.8	7.27e-83	2-842	77-1026	76.3
PROMBP/BMPG/PGR2	proteoglycan 2, pro eosinophil major basic protein (ENSG00000186652)	P13727 (222)	PDB 7Y5N	Structure of 1:1 papp-a.Prombp complex(half map)	1-222	/			AF-Q18821-F1	88.65	C-type lectin domain-containing protein	Caenorhabditis elegans	0.88	30.1	3.314e-8	14-136	23-145	96.5
									AF-A1ZB48-F1	91.5	FI01427p	Drosophila melanogaster	0.69	20.9	2.95e-6	9-135	27-166	92.7
			→ BLASTP 14 in Table S2A									Bony fishes
STC1	stanniocalcin 1 (ENSG00000159167)	P52823 (247)	AF-P52823-F1 (no PDB)	/	1-247	78.3			AF-F7B7V5-F1	80.6	Uncharacterized protein	Ciona intestinalis	0.68	21.8	2.31e-9	6-247	25-234	83.5
									AF-A0A820TK68-F1	78.8	Hypothetical protein	Rotaria socialis (Lophotrochozoa)	0.60	18.2	1.62e-2	41-197	259-425	80.2
			→ BLASTP 15 in Table S2A									Nematoda
STC2	stanniocalcin 2 (ENSG00000113739)	O76061 (302)	PDB 8HGH	Structure of 2:2 papp-a.Stc2 complex	chain C (1-302)	/			AF-Q09EE8-F1	84.65	Uncharacterized protein	Caenorhabditis elegans	0.60	17.1	5.43e-3	11-148	26-159	90.1
			→ BLASTP 16 in Table S2A									Fungi
GH	growth hormone (ENSG00000259384)	P01241 (217)	PDB 1HGU	Human growth hormone	27-217	/			AF-Q8AUU3-F1	64.4	Growth hormone	Petromyzon marinus	0.64	23.2	4.93e-2	6-179	32-195	67.4
			AF-P01241-F1	/	1-217	80.3							0.59	22.9	1.88e-5	1-217	1-203	64.4
			→ BLASTP 17 in Table S2A									Petromyzon marinus
GHR	growth hormone receptor (ENSG00000112964)	P10912 (638)	PDB 1A22	Human growth hormone bound to single receptor	chain B (19-256)	/			AF-A0A678UEC7-F1	53.2	Prolactin receptor	Petromyzon marinus	NA	30.9	3.26e-17	6-189	57-253	89.7
			AF-P10912-F1	Growth hormone receptor	1-638	58	long C-terminal disordered, no additional domain with pLDTT≥ 70 outside PDB		not usable (pLDDT < 70)
			→ BLASTP 18 in Table S2A									Petromyzon marinus

## Sheet: Table S2A
	Table S2A : BLASTP (NCBI) searches against nr (non-redundant) protein sequence database: significant results for proteins as listed in Table S1. Q=query. Grey cells: reciprocal BLASTP searches
	name	species	Total score	Query cover	E-Value	% Id	Target lenght	accession number
	BLASTP 1: INS
	Q: Human insulin; Blastp excluding Vertebrata (taxid:7742)								no significant results when Drosophila is targeted (with nr or PDB as databases)
	insulin-like	Argiope bruennichi	52.8	0.98	0.000008	34.5	118	XP_055953494.1
	Q: Argiope insulin XP_055953494.1; Blastp in Drosophila melanogaster and Caenorhabditis
	insulin-like peptide 2	Drosophila melanogaster	44.7	0.77	0.00005	27	137	NP_524012.1
	insulin-like peptide 3	Drosophila melanogaster	38.9	0.59	0.001	38	120	NP_648360.2
	Unnamed protein product	Caenorhabditis bovis	37	0.86	0.006	31.6	111	CAB3409430.1
	Comment: by excluding vertebrate clade, BLASTP gave significant alignment with a protein named insulin-like found in the spider Argiope bruennichi (Table S2), this sequence exhibiting a significant similarity with insulin-like peptides 2 and 3 in Drosophila melanogaster and with an unnamed protein product in Caenorhabditis elegans.
	BLASTP 2: IGF-II
	Q: Human IGF-II; Blastp in Ecdysozoa (taxid:1206794)
	Insulin-like growth factor II	Cyphomyrmex costatus	55.8	0.66	4e-07	28.77%	203	KYM93903.1
	Insulin-like growth factor II	Trichinella spiralis	41.6	0.47	0.002	27.55%	124	NP_524012.1
	BLASTP 3: IGF-I
	Q: Human IGF-I; Blastp in Ecdysozoa (taxid:1206794)
	insulin-like growth factor I isoform X1	Cataglyphis hispanica	63.5	0.9	1e-09	28.96	228	XP_050445533.1
	IlGF domain-containing protein	Aphelenchoides besseyi	42.4	0.44	0.001	30.48	128	KAI6221138.1
	BLASTP 4: INSR
	Q: Human INSR; in Blastp in Ecdysozoa (taxid:1206794)
	INR, partial [Drosophila melanogaster]	Drosophila melanogaster	803	0.94	0.0	37.18%	2049	ACY01693.1
	Q: Drosophila INR ACY01693.1; reciprocal Blastp in Human (taxid:9606) → first alignment
	insulin-like growth factor 1 receptor isoform 1 precursor [Homo sapiens]	Homo sapiens	815	0.65	0.0	37.45%	1367	NP_000866.1
	BLASTP 5: IGF1R
	Q: Human IGF1R; Blastp excluding Vertebrata (taxid:7742)
	insulin-like peptide receptor	Lineus longissimus	1097	0.92	0.0	45.5%	1456	XP_064650847.1
	insulin-receptor	Blattella germanica	1063	0.92	0.043	0.73	1403	CDI30232.1
	Q: Blatella insulin-receptor CDI30232.1; Blastp in Drosophila melanogaster
	insulin-like receptor	Drosophila melanogaster	911	0.91	0.040	0.32	3148	CAY93031.1
	BLASTP 6: IGF2R
	Q: Human IGF2R; Blastp in Drosophila melanogaster
	lysosomal enzyme receptor protein, isoform B	Drosophila melanogaster	517	0.68	3e-42	26.23%	887	NP_733167.2
	Q: Drosophila NP_733167.2; reciprocal Blastp in Human (taxid:9606) → first alignment
	insulin-like growth factor 2 receptor	Homo sapiens	481	0.75	1e-46	26.23%	2491	AAF16870.1
	BLASTP 7: IGFBP-2
	Q: Human IGFBP-2; Blastp excluding Gnathostomata (taxid:7776)
	insulin-like growth factor-binding protein 2	Petromyzon marinus	199	0.88	2e-57	42.44%	338	XP_032801029.1
	Q: Petromyzon marinus IGFBP-2 XP_032801029.1; reciprocal Blastp in Human (taxid:9606) → first alignment
	insulin-like growth factor-binding protein 2	Homo sapiens	188	0.84	6e-56	41.39%	328	AAA36048.1
	BLASTP 8: IGFBP-3
	Q: Human IGFBP-3; Blastp excluding Gnathostomata (taxid:7776)
	insulin-like growth factor-binding protein 3	Petromyzon marinus	209	0.99	6e-63	47.08%	310	XP_032819925.1
	Q: Petromyzon marinus IGFBP-3 XP_032819925.1; reciprocal Blastp in Human (taxid:9606) → first alignment
	insulin-like growth factor-binding protein 3	Homo sapiens	246	0.83	1e-79	49.24%	270	KAI4013757.1
	BLASTP 9: IGFBP-4
	Q: Human IGFBP-4; Blastp in cartilagineous fish (taxid:7777)
	insulin-like growth factor-binding protein 4	Callorhinchus milii	248	0.94	3e-81	52.02%	270	XP_007899760.1
	Q: Callorhinchus milii IGFBP-4 XP_007899760.1; reciprocal Blastp in Human (taxid:9606) → first alignment
	insulin-like growth factor-binding protein 4	Homo sapiens	248	0.92	4e-81	52.02%	278	AAA62670.1
	BLASTP 10: IGFBP-5
	Q: Human IGFBP-5; Blastp excluding Vertebrata (taxid:7742)
	Predicted: insulin-like growth factor-binding protein 5	Branchiostoma belcheri	140	0.9	2e-35	35.09%	306	XP_019624115.1
	Q: Branchiostoma belcheri IGFBP-5 XP_019624115.1; reciprocal Blastp in Human (taxid:9606) → first alignment
	insulin-like growth factor-binding protein 5 precursor	Homo sapiens	149	0.89	5e-42	35.09%	272	CAG33090.1
	BLASTP 11: IGFBP-6
	Q: Human IGFBP-6; Blastp in Gnatostoma (taxid:7776) excluding Tetrapoda (taxid: 32523)
	insulin-like growth factor-binding protein 6a	Alosa sapidissima	135	0.98	7e-37	38.43%	208	XP_041945459.1
	Q: Alosa s IGFBP-6 XP_041945459.1; reciprocal Blastp in Human (taxid:9606) → first alignment
	insulin-like growth factor-binding protein 6	Homo sapiens	133	0.66	1e-37	43.98%	238	KAI2565898.1
	Q: Human IGFBP-6; Blastp in spotted gar (taxid:7776)
	insulin-like growth factor-binding protein 6b	Lepisosteus oculatus	118	0.7	2e-32	41.92%	219	XP_015199529.1
	Q: Lepisosteus oculatus IGFBP-6 XP_015199529.1; reciprocal Blastp in Human (taxid:9606) → first alignment
	insulin-like growth factor-binding protein 6	Homo sapiens	122	0.69	2e-33	42.77%	238	KAI2565898.1
	BLASTP 12: human ALS
	Q: Human ALS in Ecdysozoa
	insulin-like growth factor-binding protein complex acid labile subunit	Athalia rosae	411	0.8	1e-68	35.50%	548	XP_012267294.2
	Q: Human ALS in Procaryotes
	leucine-rich repeat domain-containing protein	Acidobacteriota bacterium	516	0.75	4e-66	39.65%	1239	MDE2926881.1
	Q: MDE2926881.1; reciprocal Blastp in Human (taxid:9606) → first alignment
	Chain A, Insulin-like growth factor-binding protein complex acid labile subunit	Homo sapiens	425	0.45	2e-66	39.65%	578	7WRQ_A
	Insulin-like growth factor binding protein, acid labile subunit	Homo sapiens	426	0.45	3e-66	39.65%	605	AAH25681.1
	BLASTP 13: PAPP-A
	Q: Human PAPP_A; Blastp in Nematoda (taxid:6231)								same result with PAPP_A2
	Pappalysin-1	Trichinella pseudospiralis	892	0.94	0.0	34.24%	1956	KAL1232119.1
	Q: KAL1232119.1 Trichinella; reciprocal Blastp in Human (taxid:9606) → first alignment
	pappalysin-1 preproprotein	Homo sapiens	901	0.79	0.0	34.10%	1627	NP_002572.2
	BLASTP 14: PROMBP/BMPG/PGR2
	Q: Human PGR2; Blastp in Bony fishes
	neurocan core protein-like	Huso huso	73.6	0.51	6e-13	39.13%	243	KAK6468582.1
	Q: KAK6468582.1 Huso huso ; reciprocal Blastp in Human (taxid:9606) → first alignment
	proteoglycan 2, pro eosinophil major basic protein	Homo sapiens	74.3	0.47	9e-15	39.17%	222	KAI2559936.1
	Q: Human PGR2; Blastp in Ecdysozoa
	CBN-CLEC-50 protein	Aphelenchoides avenae	64.7	0.54	4e-10	30.89%	191	KAH7718716.1
	Q: ; reciprocal Blastp in Human (taxid:9606) → first alignment
	proteoglycan 3 precursor	Homo sapiens	67.4	0.59	1e-12	32.77%	225	NP_006084.2	not PGR2
	Q: Human PGR2; Blastp in Ciona
	macrophage mannose receptor 1-like	Ciona intestinalis	52.8	0.59	7e-07	27.74%	2158	XP_026691626.1
	Q: ; reciprocal Blastp in Human (taxid:9606) → first alignment
	Mannose receptor, C type 1-like 1	Homo sapiens	1670	0.79	4e-124	30.78%	1456	AAI46839.1	not PGR2
	BLASTP 15: STC1
	Q: Human STC1; Blastp excluding Vertebrata (taxid: 7711)
	hypothetical protein PRIPAC_79727	Pristionchus pacificus	51.2	0.42	0.001	30.28%	148	KAF8373298.1
	Q: Pristionchus pacificus KAF8373298.1; reciprocal Blastp in Human (taxid:9606) → first alignment
	stanniocalcin, partial	Homo sapiens	51.6	0.74	1e-07	30.28%	157	AAC97949
	BLASTP 16: STC2
	Q: Human STC2; Blastp excluding Vertebrata (taxid: 7711)
	hypothetical protein HDV05_004977	Chytridiales sp. JEL 0842	50.1	0.38	0.006	28.33%	188	KAJ340844	unique result (beside synthetic construct)
	Q: KAJ340844 Chrytridiales; reciprocal Blastp in Human (taxid:9606) → first alignment
	Chain P, Stanniocalcin-2	Homo sapiens	51.6	0.64	3e-07	28.33%	167	8A7D_P
	Chain A, Stanniocalcin-2	Homo sapiens	51.2	0.64	4e-07	28.33%	168	8A7E_A
	Q: Human STC2; Blastp in Ecdysozoa (taxid:1206794)
	hypothetical protein M3Y98_01043200	Aphelenchoides besseyi	44.3	0.35	0.010	26.85%	157	KAI6173073.1	unique result
	Q: KAI6173073.1 Aphelenchoides besseyi; reciprocal Blastp in Human (taxid:9606) → first alignment
	no significant result found
	BLASTP 17: GH
	Q: Human GH; Blastp excluding Gnathostomata (taxid:7776)
	somatotropin-like isoform X2	Petromyzon marinus	63.5	0.96	5e-08	26.89%	202	XP_032835209.1
	Q: Petromyzon marinus somatotropin-like isoform X2 XP_032835209.1; reciprocal Blastp in Human (taxid:9606) → first alignment
	Chain A, prolactin	Homo sapiens	59.7	0.86	6e-10	25.13%	199	1RW5A
	BLASTP 18: GHR
	Q: Human GHR; Blastp excluding Gnathostomata (taxid:7776)
	growth hormone receptor	Petromyzon marinus	124	0.46	2e-25	29.50%	734	QHX35240.1
	Q: Petromyzon marinus GHR QHX35240.1; reciprocal Blastp in Human (taxid:9606) → first alignment
	growth hormone receptor	Homo sapiens	142	0.42	4e-34	29.75%	616	KAI4021133.1

## Sheet: Table S2B
	Table S2B : PHIBLASTP (NCBI) searches against nr (non-redundant) protein sequence database. Species targeted is the one corresponding to the most distant species according to FSS/BLASTP. Grey cells: reciprocal PHIBLASTP searches.
	Symbol	Prosite data (via UniProt#): signature/consensus pattern*	PHI-BLASTP analysis: first results								First result of the reciprocal PHIBLASTP targeted in humans	Comments
			Species targeted	Name & [species]	Total score	Query cover	E-Value	% Id	Target lenght	accession number
	INS	C-C-{P}-{P}-x-C-[STDNEKPI]-x(3)-[LIVMFS]-x(3)-C	Ecdysozoa	uncharacterized protein NPIL_265251 [Nephila pilipes]	30.3	0.99	3e-06	0.00%	175	GFS69381.1	AAA59179.1, INS	/
	IGF-I		Ecdysozoa	hypothetical protein ONE63_006452 [Megalurothrips usitatus]	40.8	0.58	2e-09	0.00%	273	KAJ1529697.1	XP_054227926.1 IGF1	/
	IGF-II		Ecdysozoa	ILP2 protein [Recilia dorsalis]	34.4	0.5	2e-07	0.00%	264	XUU11147.1	AAA52443.1, preproinsulin-like growth factor II, domains A_E	/
	INSR	[LIV]-G-{P}-G-{P}-[FYWMGSTNH]-[SGA]-{PW}-[LIVCAT]-{PD}-x-[GSTACLIVMFY]-x(5,18)-[LIVMFYWCSTAR]-[AIVP]-[LIVMFAGCKR]-K	Drosophila melanogaster	INR, partial [Drosophila melanogaster]	757	0.94	0.0	0.00%	2049	ACY01693.1		/
		[LIVMFYC]-{A}-[HY]-x-D-[LIVMFY]-[RSTAC]-{D}-{PF}-N-[LIVMFYC](3)			756	0.94	0.0	0.00%	2049
		[DN]-[LIV]-Y-x(3)-Y-Y-R			763	0.94	0.0	0.00%	2049
	IGF type 1 receptor	[LIV]-G-{P}-G-{P}-[FYWMGSTNH]-[SGA]-{PW}-[LIVCAT]-{PD}-x-[GSTACLIVMFY]-x(5,18)-[LIVMFYWCSTAR]-[AIVP]-[LIVMFAGCKR]-K	Drosophila melanogaster	INR, partial [Drosophila melanogaster]	779	0.93	0.0	0.00%	2049	ACY01693.1		/
		[LIVMFYC]-{A}-[HY]-x-D-[LIVMFY]-[RSTAC]-{D}-{PF}-N-[LIVMFYC](3)			782	0.93	0.0	0.00%	2049
		[DN]-[LIV]-Y-x(3)-Y-Y-R			789	0.93	0.0	0.00%	2049
	IGF type 2 receptor (IGF-II/CIM6PR)	C-x(2)-P-F-x-[FYWIV]-x(7)-C-x(8,10)-W-C-x(4)-[DNSR]-[FYW]-x(3,5)-[FYW]-x-[FYWI]-C	Ecdysozoa	No significant similarity found	/							No significant similarity found when Ciona or Agnatha were targeted: BLASTP was more efficient. PHIBLAST gave significant results in bony fishes		cation-independent mannose-6-phosphate receptor [Amia ocellicauda]	2718	0.99	0.0	0.00%	2488	XP_066553553.1	AAP37954.1, IGF2R
	IGFBP-1	[GP]-C-[GSET]-[CE]-[CA]-x(2)-C-[ALP]-x(6)-C	Lamprey (Petromyzon marinus)	insulin-like growth factor binding protein 3 transcript variant 1 [Petromyzon marinus]	111	0.86	6e-33	0	310	AQM55952.1	KAI4013757.1, IGFBP-3	no IGFBP-1 in the result
		[FYWHPVAS]-x(3)-C-x(3,4)-[SG]-x-[FYW]-x(3)-Q-x(5,12)-[FYW]-C-[VA]-x(3,4)-[SG]			96.1	0.86	5e-28	0	310	AQM55952.1
	IGFBP-2	[GP]-C-[GSET]-[CE]-[CA]-x(2)-C-[ALP]-x(6)-C	Lamprey (Petromyzon marinus)	insulin-like growth factor-binding protein 2 [Petromyzon marinus]	149	0.82	1e-43	0.00%	365	XP_032831272.2	AAA36048.1, IGFBP-2	/
		[FYWHPVAS]-x(3)-C-x(3,4)-[SG]-x-[FYW]-x(3)-Q-x(5,12)-[FYW]-C-[VA]-x(3,4)-[SG]		insulin-like growth factor-binding protein 4 isoform X1 [Petromyzon marinus]	184	0.91	2e-54	0.00%	338	XP_032801029.1	AAA36048.1, IGFBP-2	/
	IGFBP-3	[GP]-C-[GSET]-[CE]-[CA]-x(2)-C-[ALP]-x(6)-C	Lamprey (Petromyzon marinus)	insulin-like growth factor binding protein 3 transcript variant 1 [Petromyzon marinus]	181	0.96	4e-53	0.00%	310	AQM55952.1	KAI4013757.1, IGFBP-3	/
		[FYWHPVAS]-x(3)-C-x(3,4)-[SG]-x-[FYW]-x(3)-Q-x(5,12)-[FYW]-C-[VA]-x(3,4)-[SG]			243	0.87	6e-79	49.06%	310			/
	IGFBP-4	[GP]-C-[GSET]-[CE]-[CA]-x(2)-C-[ALP]-x(6)-C	Elephant shark (Callorhinchus milii)	insulin-like growth factor-binding protein 4 [Callorhinchus milii]	235	0.95	3e-70	0.00%	270	XP_007899760.1	AAA62670.1, IGFBP-4	/
		[FYWHPVAS]-x(3)-C-x(3,4)-[SG]-x-[FYW]-x(3)-Q-x(5,12)-[FYW]-C-[VA]-x(3,4)-[SG]			196	0.95	3e-58	0.00%	270	XP_007899760.1		/
	IGFBP-5	[GP]-C-[GSET]-[CE]-[CA]-x(2)-C-[ALP]-x(6)-C	Amphioxus (Branchiostoma lanceolatum)	PREDICTED: insulin-like growth factor-binding protein 5 [Branchiostoma belcheri]	129	0.96	1e-38	0.00%	310	CAH1253193.1	CAG3390.1, IGFBP-5	/
		[FYWHPVAS]-x(3)-C-x(3,4)-[SG]-x-[FYW]-x(3)-Q-x(5,12)-[FYW]-C-[VA]-x(3,4)-[SG]			117	0.96	3e-33	0.00%	310	CAH1253193.1		/
	IGFBP-6	[FYWHPVAS]-x(3)-C-x(3,4)-[SG]-x-[FYW]-x(3)-Q-x(5,12)-[FYW]-C-[VA]-x(3,4)-[SG]	Danio rerio	nsulin-like growth factor binding protein 6a precursor [Danio rerio]	119	0.81	7e-17	0.00%	195	NP_001154873.3	KAI2565898.1, IGFBP-6	this result is not the first but the 6th after IGFBP-5 and -2
	PAPP-A	H-E-x-x-H-x-x-G-x-x-H	Ecdysozoa	pappalysin-1-like isoform X2 [Tachypleus tridentatus]	1094	0.94	0.0	0.00%	1589	XP_076320930.1	KAI4008198.1, pappalysin 1	No significant similarity found when Drosophila was targeted
	PAPP-A2	H-E-x-x-H-x-x-G-x-x-H			1016	0.87	0.0	0.00%	1589	XP_076320930.1
	STC1	[LIV]-G-{P}-G-{P}-[FYWMGSTNH]-[SGA]-{PW}-[LIVCAT]-{PD}-x-[GSTACLIVMFY]-x(5,18)-[LIVMFYWCSTAR]-[AIVP]-[LIVMFAGCKR]-K	Ecdysozoa	No significant similarity found	/							No significant similarity found when Ciona or Agnatha were targeted: BLASTP was more efficient. PHIBLAST gave significant results in bony fishes		stanniocalcin-1 [Erpetoichthys calabaricus]	289	1	3e-82	0.00%	247	XP_028661864.1	NP_003146.1, stanniocalcin-1 precursor
	GH/somatotropin	C-x-[STN]-x(2)-[LIVMFYS]-x-[LIVMSTA]-P-x(5)-[TALIV]-x(7)-[LIVMFY]-x(6)-[LIVMFY]-x(2)-[STACV]-W	Lamprey (Petromyzon marinus)	No significant similarity found	/							No significant similarity found when lamprey was targeted: BLASTP was more efficient. PHIBLAST gave significant results in elephant shark		growth hormone [Callorhinchus milii]	113	0.99	2e-34	0.00%	211	BAT33110.1	AAT11509.1, growth hormone 1 variant 2
		*not available for: STC2, ALS, IMPL2, GHR and proMBP/PGR2

## Sheet: Table S3
Table S3: Five of the longest human IGF-II/CIM6PR domains for which an experimental 3D structure has been solved and covering 70% of the receptor were searched for structural similary using FSS; mean pLDDT values calculated in the interval of aligned sequences in the target are indicated in the last column. Below the table is shown the AF2 3D structure model of their common target (average pLDDT …
human IGF-II/CIM6PR domains (UniProt P11717)			FSS RAW RESULTS								AFDB
PDB Id	title	interval	Target	name	species	TM-score (significant when > 0.5; in bold)	seq ID	E-value	Aligned amino acids (query)	Aligned amino acids (target)	pLDDT (calculated for aligned AA in target)
6P8I	N-terminal 5 domains of IGFIIR	36-763 (728)	AF-A0A0B4KH68-F1-model_v	Lysosomal enzyme receptor protein, isoform E (Lerp)	Drosophila melanogaster	0.41	18.2	3.48e-30	3-662	68-782	84
6Z31	Human cation-independent mannose 6-phosphate/ igf2 receptor domain 8	1082-1220 (139)	"	"	"	0.72	24	2.88e-8	1-139	201-340	88.5
6Z30	Human cation-independent mannose 6-phosphate/ igf2 receptor domains 9- 10	1222-1510 (289)	"	"	"	0.41	23.2	2.55e-17	1-283	349-700	80.5
1E6F	Human MIR-receptor, repeat 11	1508-1650 (143)	"	"	"	0.55	28.8	7.65e-9	1-129	349-479	78.7
2V5N	Structure of human igf2r domains 11-12	1508-1799 (292)	"	"	"	0.42	27.9	4.48e-18	7-271	356-661	78.9
			AF-A0A0B4KH68-F1			The pLDDT score corresponding to the 918 residues: 75.1 (confident)
						pLDDT < 50	very low
						50 < pLDDT < 70	low
						70 < pLDDT < 90	high
						90 < pLDDT	very high
				confidence

## Sheet: Table S4
Table S4: Description of TED (The Encyclopedia Domains) available in AFDB for human IGF1R and its target in Drosophila
domain#	Human IGF1R		Drosophila insulin-like-receptor
	AF-P08069-F1-v4		AF-P09208-F1-v4
	Boundaries	average pLDDT	Boundaries	average pLDDT
1	33-215	88.15	332-490/513-531	83.95
2	254-328	86	645-805	83.35
3	332-467	89.7	808-926	78.65
4	491-606	84	929-972/1123-1200	80.8
5	616-678/775-825	88	1216-1232/1240-1312	81.8
6	840-925	91.7	1356-1454	80
7	985-1082	82	1459-1684	83.1
8	1086-1285	83.05	/	/
